# Supplementary material for: Protein Malnutrition Modifies Innate Immunity and Gene Expression by Intestinal Epithelial Cells and Human Rotavirus Infection in Neonatal Gnotobiotic Pigs
Source: PubMed Central journal article supplement (PMC5332602; doi:10.1128/msphere.00046-17), 2017-03-01
Supplement: sph002172242sf1.pdf [file sph002172242sf1.pdf]

| Assigned OTUs                    |                              | HIFM | HIFM pig feces |
|----------------------------------|------------------------------|------|----------------|
| <i>Actinobacteria</i>            | <i>Rothia</i>                |      |                |
|                                  | <i>Bifidobacterium</i>       |      |                |
| <i>Bacteroidetes</i>             | <i>Rikenellaceae</i>         |      |                |
| <i>Firmicutes</i>                | <i>Planococcaceae</i>        |      |                |
|                                  | <i>Ureibacillus</i>          |      |                |
|                                  | <i>Staphylococcus</i>        |      |                |
|                                  | <i>Enterococcus</i>          |      |                |
|                                  | <i>Lactobacillus</i>         |      |                |
|                                  | <i>Streptococcus</i>         |      |                |
|                                  | <i>Clostridiales</i>         |      |                |
|                                  | <i>Clostridiaceae</i>        |      |                |
|                                  | <i>Clostridium</i>           |      |                |
|                                  | SMB53                        |      |                |
|                                  | <i>Lachnospiraceae</i>       |      |                |
|                                  | [ <i>Ruminococcus</i> ]      |      |                |
|                                  | <i>Blautia</i>               |      |                |
|                                  | <i>Peptostreptococcaceae</i> |      |                |
|                                  | <i>Ruminococcaceae</i>       |      |                |
|                                  | <i>Oscillospira</i>          |      |                |
|                                  | <i>Ruminococcus</i>          |      |                |
|                                  | <i>Megasphaera</i>           |      |                |
|                                  | <i>Veillonella</i>           |      |                |
| <i>Proteobacteria</i>            | <i>Shewanella</i>            |      |                |
|                                  | <i>Enterobacteriaceae</i>    |      |                |
|                                  | <i>Citrobacter</i>           |      |                |
|                                  | <i>Proteus</i>               |      |                |
|                                  | <i>Trabulsiella</i>          |      |                |
| <i>Halomonas</i>                 |                              |      |                |
| Unassigned                       |                              |      |                |
| Abundance of common OTUs (%)     |                              | 100  | 99,94          |
| Abundance of unique OTUs (%)     |                              | 0    | 0,06           |
| Abundance of unassigned OTUs (%) |                              | 0.03 | 0.17           |
